# Supplementary material for: High-Resolution Maps of Mouse Reference Populations
Source: PubMed Central journal article supplement (PMC5633391; doi:10.1534/g3.117.300188), 2017-08-23

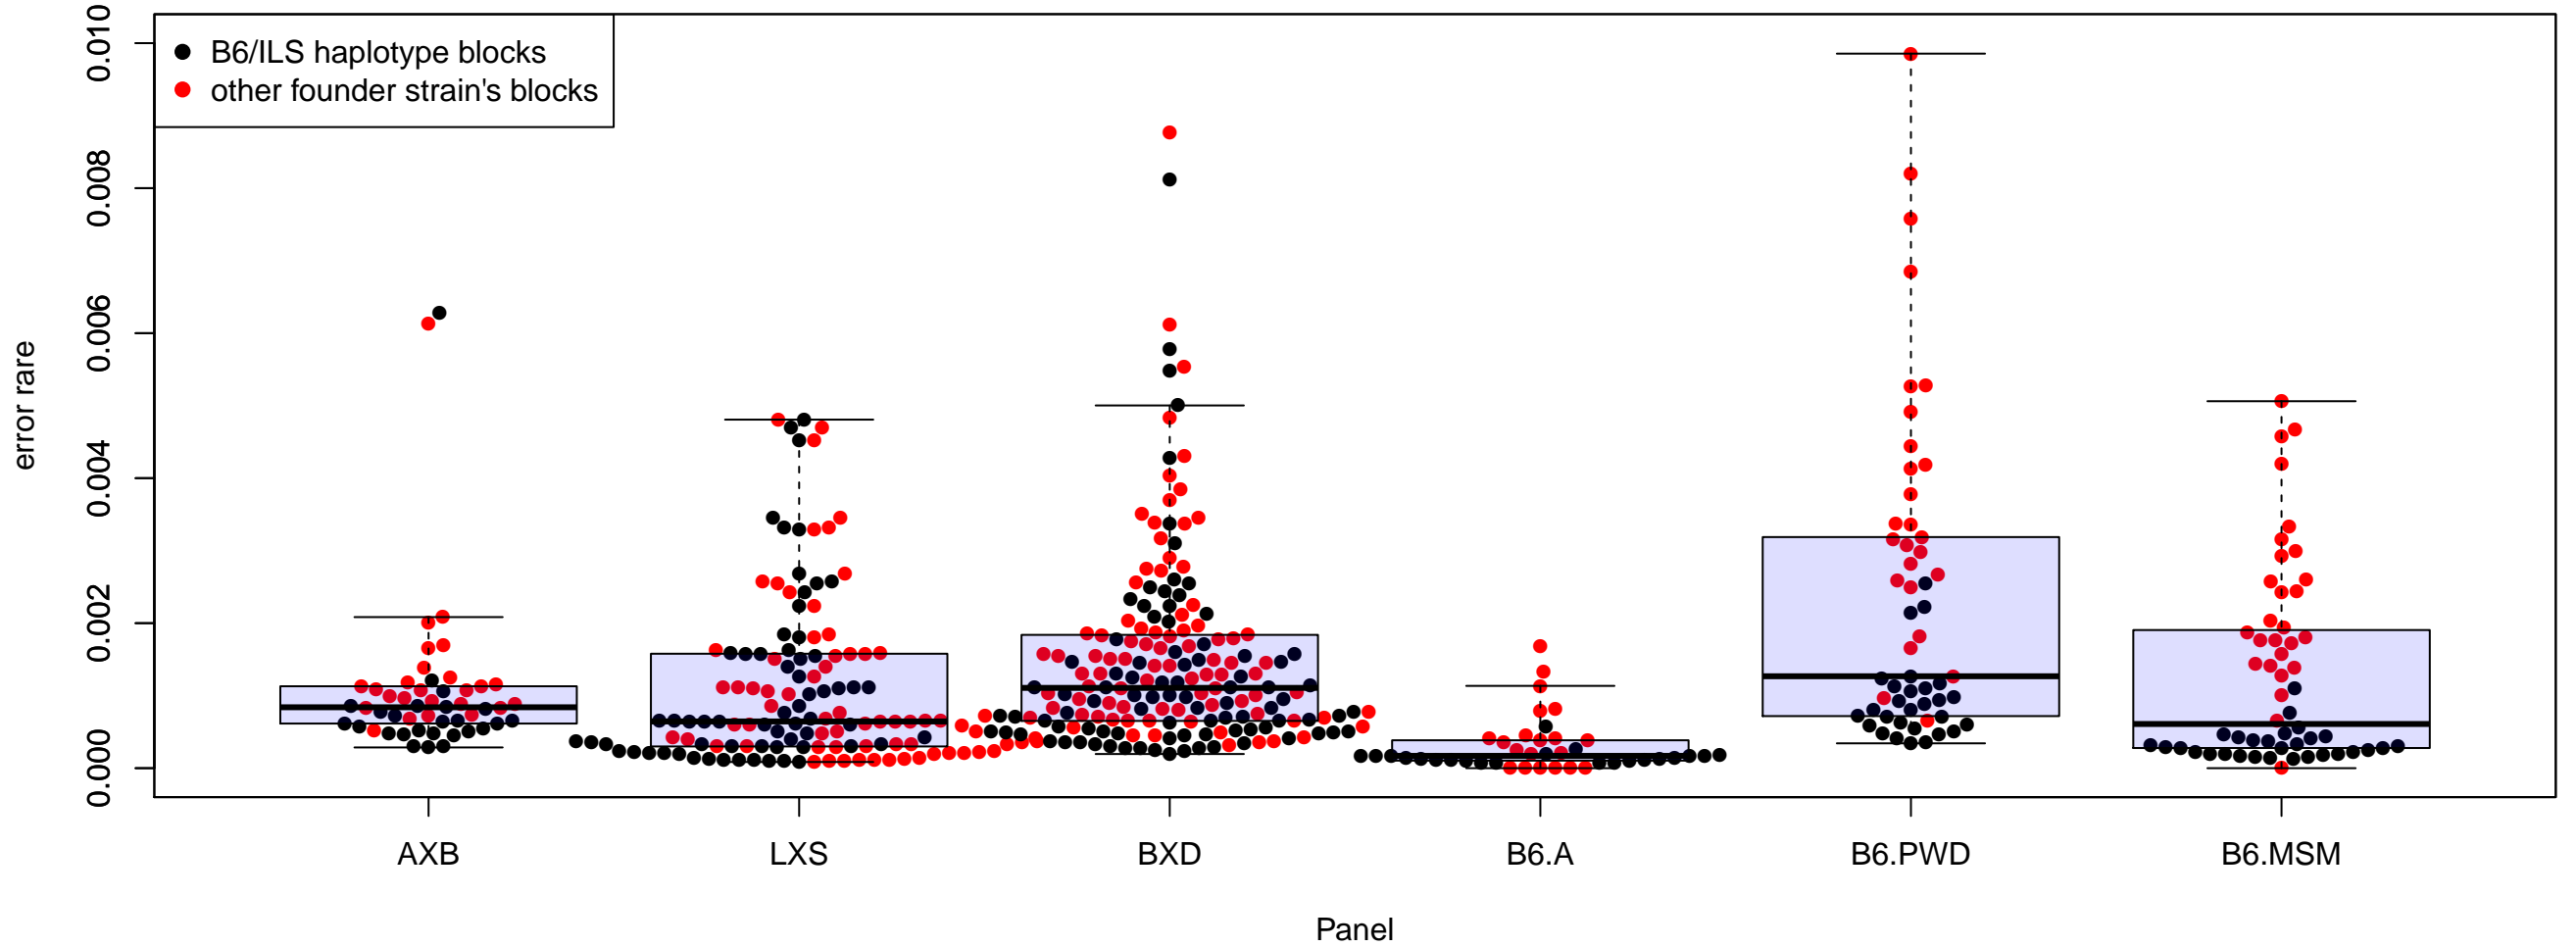

Supplement: 3427FigureS1.pdf [file 3427FigureS1.pdf]
